# Supplementary material for: Fabrication of graphitic carbon nitride synthesized via pyrolysis for environmental remediation: a detailed experimental analysis with different parametric optimizations
Source: Royal Society of Chemistry journal article supplement (doi:10.1039/d4nj01233j), 2024-01-01
Supplement: d4nj01233j1.pdf [file d4nj01233j1.pdf]

## Supplementary Information

### Fabrication of graphitic carbon nitride synthesized via pyrolysis for environmental remediation: A detailed experimental analysis with different parametric optimizations

S. Ilakiya<sup>1</sup>, M. Keerthana<sup>2</sup>, N. Ponpandian<sup>2</sup>, P. Thangadurai<sup>1,\*</sup>

<sup>1</sup>Centre for Nanoscience and Technology, Pondicherry University, Kalapet,  
Puducherry - 605 014, India.

<sup>2</sup>Department of Nanoscience and Technology, Bharathiar University, Coimbatore - 641046,  
Tamilnadu, India

\*Corresponding author: [thangaduraip.nst@pondiuni.edu.in](mailto:thangaduraip.nst@pondiuni.edu.in) / [thangadurai.p@gmail.com](mailto:thangadurai.p@gmail.com)

## 1.0 INTRODUCTION

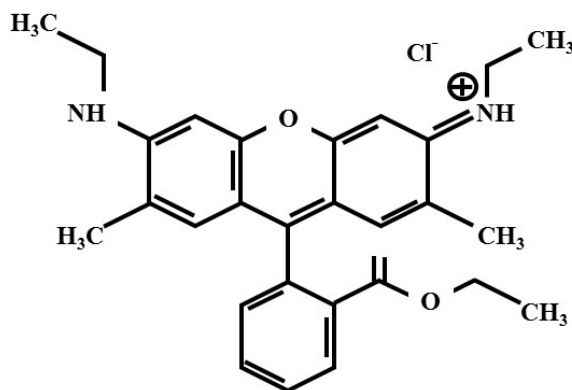

Figure S1. Chemical structure of Rh-6G dye.

## 2.0 Preparation process of g-C<sub>3</sub>N<sub>4</sub>

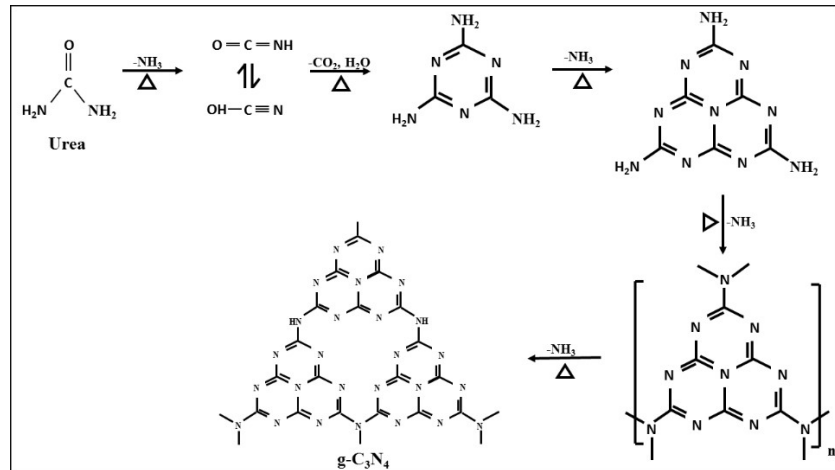

Figure S2. Preparation process of g-C<sub>3</sub>N<sub>4</sub> from urea using thermal condensation.

## 3.0 Microstructure and Composition Analysis

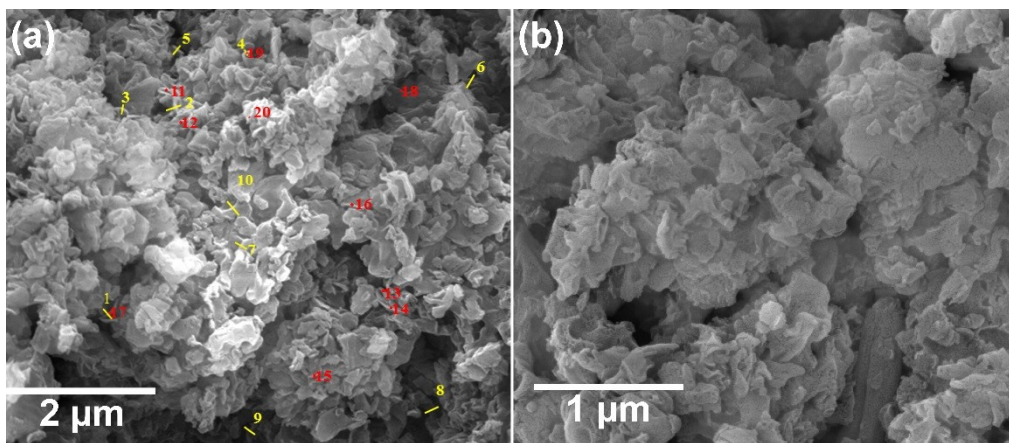

Figure S3. (a) Thickness evaluation and (b) SEM micrographs of g-C<sub>3</sub>N<sub>4</sub>.

### 3.1 XPS Analysis

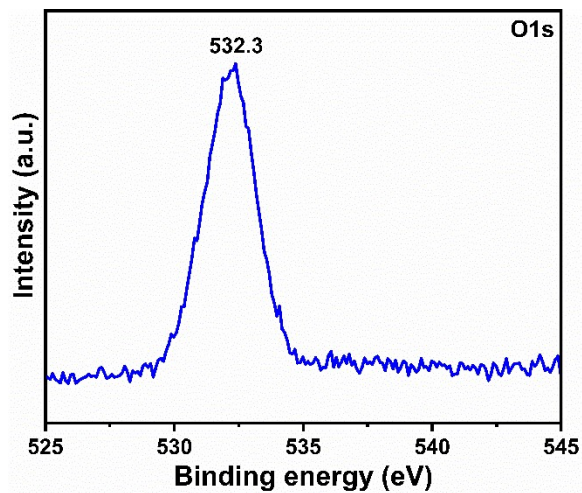

Figure S4. The XPS spectrum of g-C<sub>3</sub>N<sub>4</sub> showing the peaks corresponding to the constituent elements O.

#### 4.0 Optimization of Rhodamine-6G dye concentration

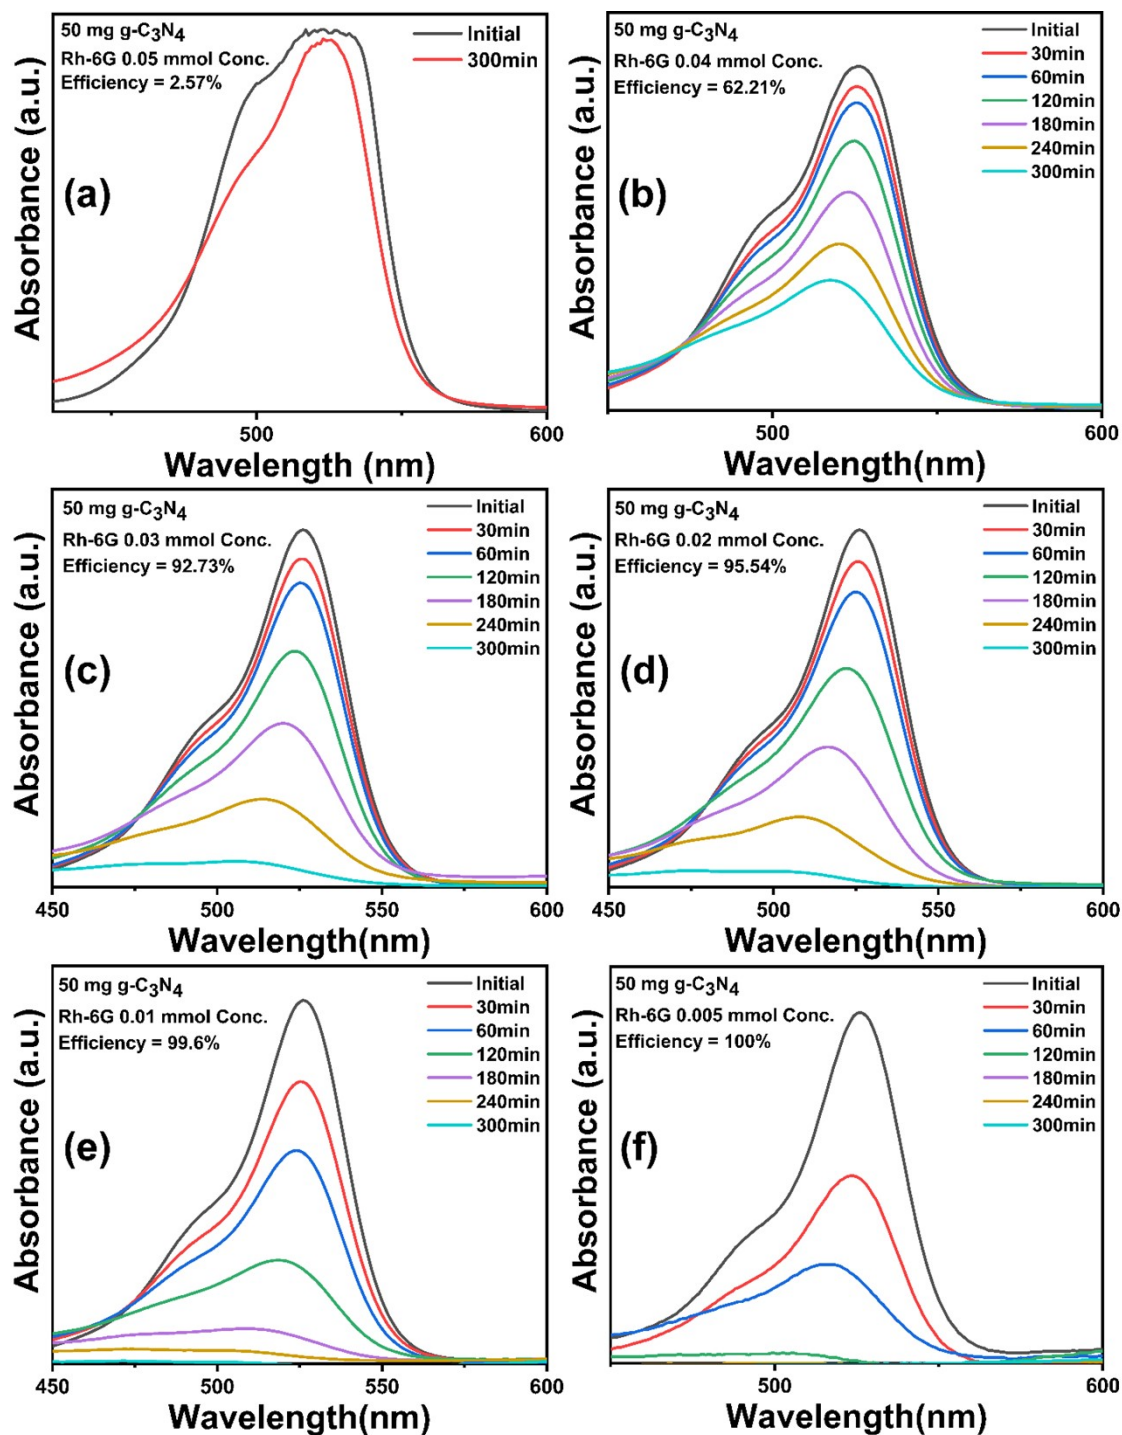

Figure S5: Represents the concentration optimization of g-C<sub>3</sub>N<sub>4</sub> photocatalyst in Rh-6G dye under UV light illumination. (a) 0.05 mmol, (b) 0.04 mmol, (c) 0.03 mmol, (d) 0.02 mmol, (e) 0.01 mmol, (f) 0.005 mmol concentrations.

Table T1. The rate constant and degradation efficiency values for concentration and catalyst loading optimization experiment.

| Concentration<br>(mmol) | Rate constant | Efficiency<br>(%) | Catalyst<br>(mg) | Rate<br>constant | Efficiency<br>(%) |
|-------------------------|---------------|-------------------|------------------|------------------|-------------------|
| 0.005                   | 1.8852        | 100               | 10               | 0.2292           | 69.6              |
| 0.01                    | 1.2774        | 99.6              | 20               | 0.3078           | 80.9              |
| 0.02                    | 0.564         | 95.5              | 30               | 0.3816           | 87.1              |
| 0.03                    | 0.4776        | 92.7              | 40               | 0.4824           | 92.4              |
| 0.04                    | 0.1944        | 62.2              | 50               | 0.9276           | 99.6              |
|                         |               |                   | 60               | 0.3306           | 84.5              |
|                         |               |                   | 70               | 0.4398           | 90.2              |

## 4.1 Optimization of catalyst loading

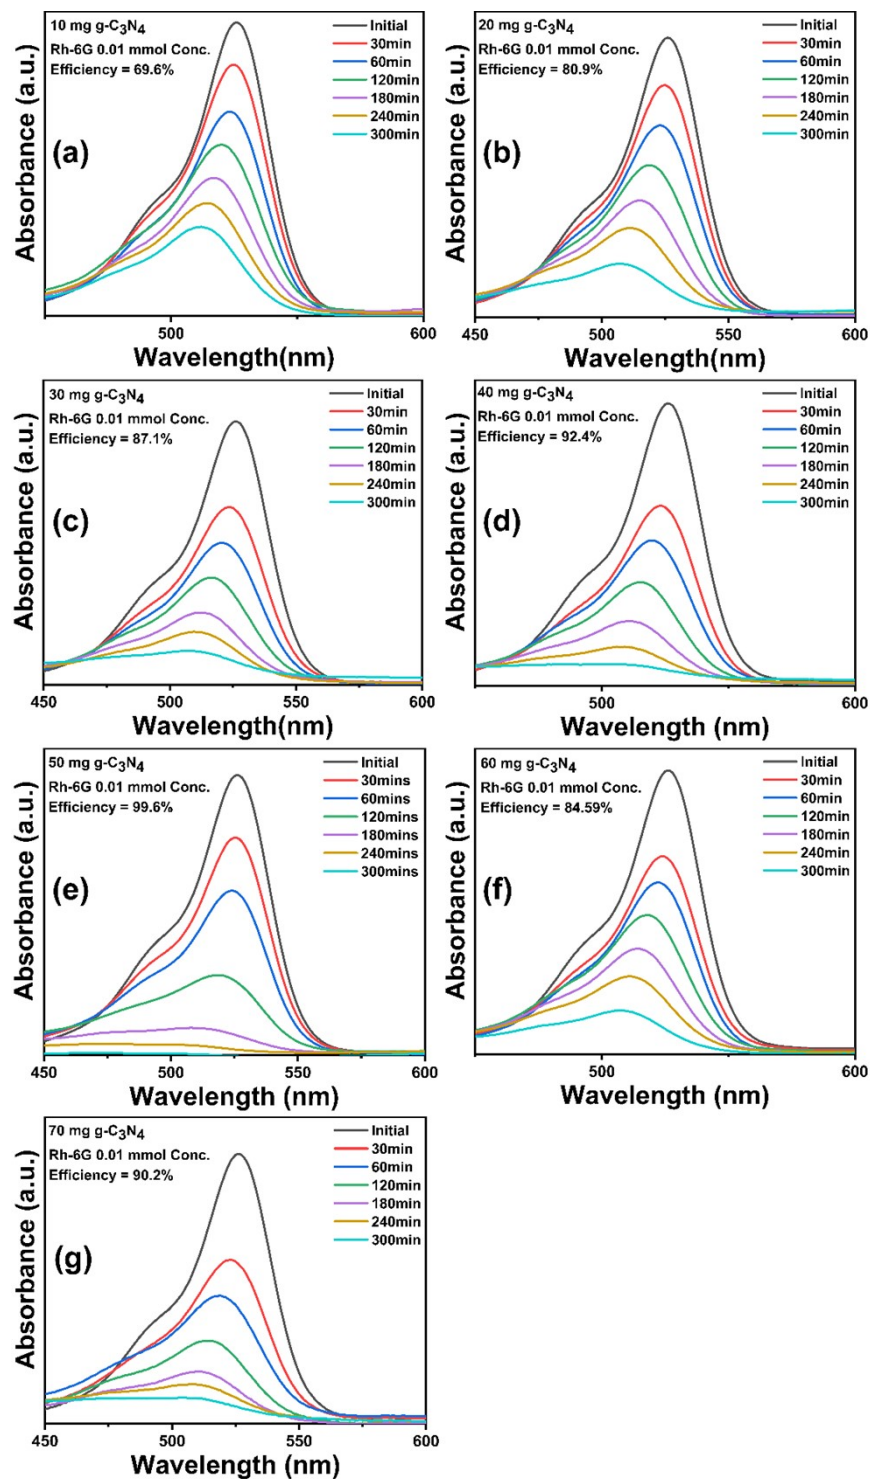

Figure S6: Represents the catalyst optimization of g-C<sub>3</sub>N<sub>4</sub> photocatalyst in Rh-6G dye under UV light illumination. (a) 10 mg, (b) 20 mg, (c) 30 mg, (d) 40 mg, (e) 50 mg, (f) 60 mg, (g) 70 mg.

## 4.2 PHOTOCHEMICAL REACTIONS INVOLVED IN Rh-6G DYE DEGRADATION BY g-C<sub>3</sub>N<sub>4</sub>

The photochemical reactions involved during the photocatalytic degradation of Rh-6G dye by the g-C<sub>3</sub>N<sub>4</sub> nanosheet photocatalyst under the UV light irradiation.

1. The photoexcitation of g-C<sub>3</sub>N<sub>4</sub>  
$$\text{g-C}_3\text{N}_4 + h\nu \rightarrow e^- + h^+$$
2. Ionosorption of oxygen  
$$\text{O}_2 + e^- \rightarrow \bullet\text{O}_2^-$$
3. Followed by ionization of water  
$$\text{H}_2\text{O} \rightarrow \text{OH}^- + \text{H}^+$$
4. The hydroxyl ion gets oxidized  
$$\text{OH}^- + h^+ \rightarrow \bullet\text{OH}$$
5. The superoxide radical gets protonated  
$$\bullet\text{O}_2^- + \text{H}^+ \rightarrow \text{HO}_2\bullet$$
6. Co-scavenging of electron  
$$\text{HO}_2\bullet + e^- \rightarrow \text{HO}_2^-$$
7. Formation of hydrogen peroxide  
$$\text{HO}_2^- + \text{H}^+ \rightarrow \text{H}_2\text{O}_2$$
8.  $\bullet\text{OH}$  radical formation  
$$\text{H}_2\text{O}_2 + e^- \rightarrow \bullet\text{OH} + \text{OH}^-$$
9. Degradation of dye in water by the active species  
Pollutant +  $\bullet\text{O}_2^- \rightarrow$  Degradation product  
Pollutant +  $h^+ \rightarrow$  Oxidation product

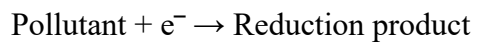



### 4.3 RADICAL TRAPPING EXPERIMENT ON g-C<sub>3</sub>N<sub>4</sub> IN Rh-6G DYE

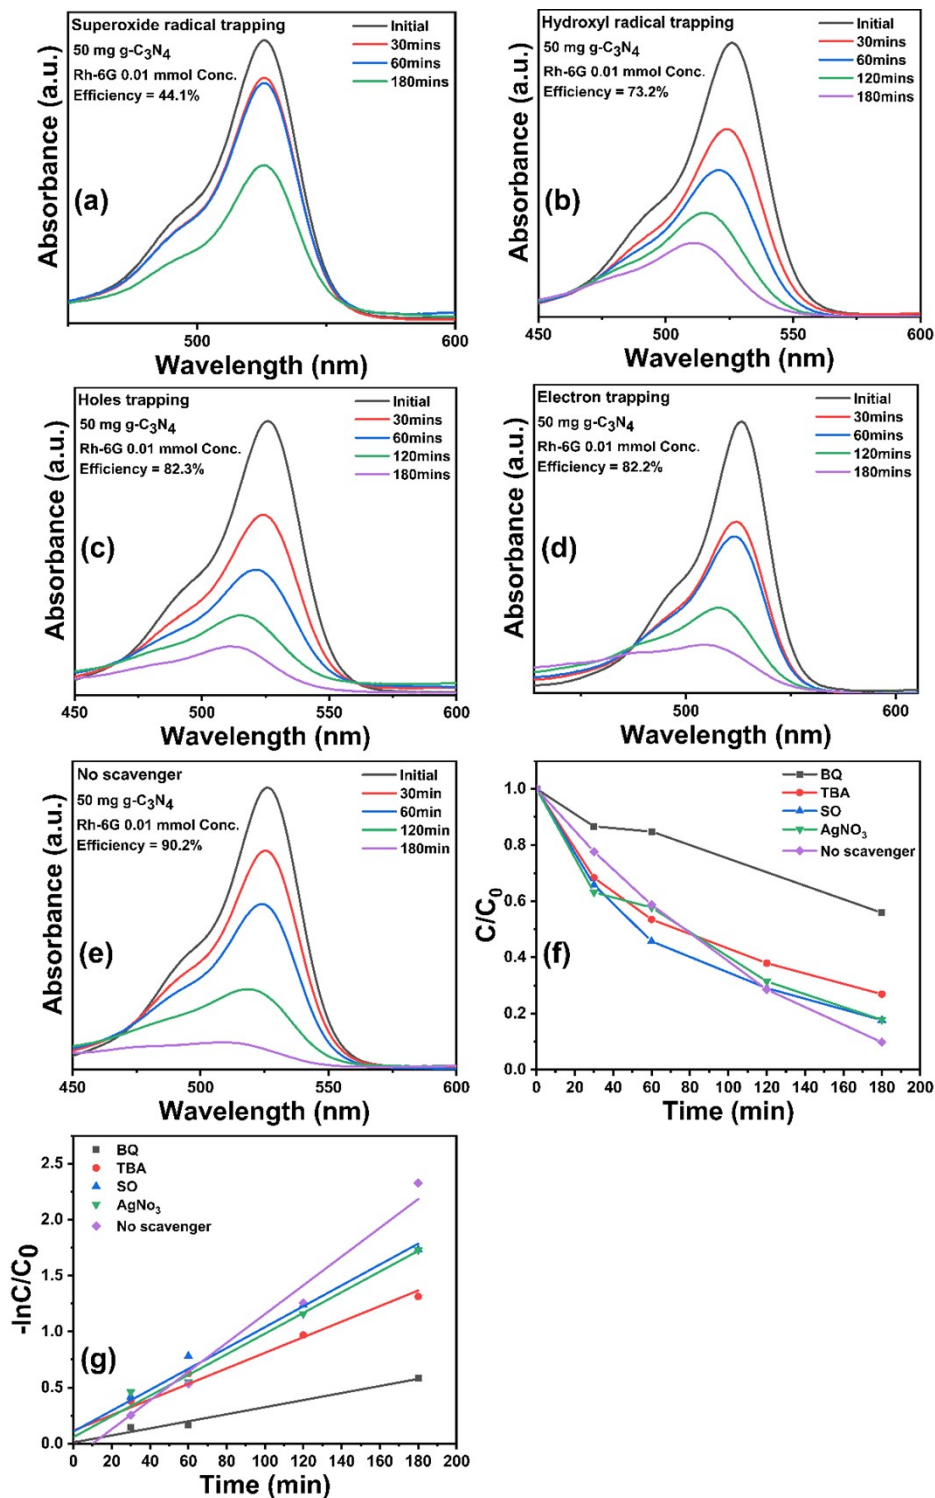

Figure S7: Shows the effect of radical scavenger on Rh 6G photodegradation on g-C<sub>3</sub>N<sub>4</sub> photocatalyst under UV light. (a) BQ, (b) TBA, (c) SO, (d) AgNO<sub>3</sub>, (e) No scavenger, (f) C/C<sub>0</sub>, (g) Rate constant.

**Table 2.** The rate constant values for scavenger test photocatalytic studies.

| Scavenger         | Rate constant (h <sup>-1</sup> ) |
|-------------------|----------------------------------|
| BQ                | 0.189                            |
| TBA               | 0.417                            |
| SO                | 0.5592                           |
| AgNO <sub>3</sub> | 0.5544                           |
| No scavenger      | 0.7704                           |

#### 4.4 pH TEST EXPERIMENT ON g-C<sub>3</sub>N<sub>4</sub> IN Rh-6G DYE

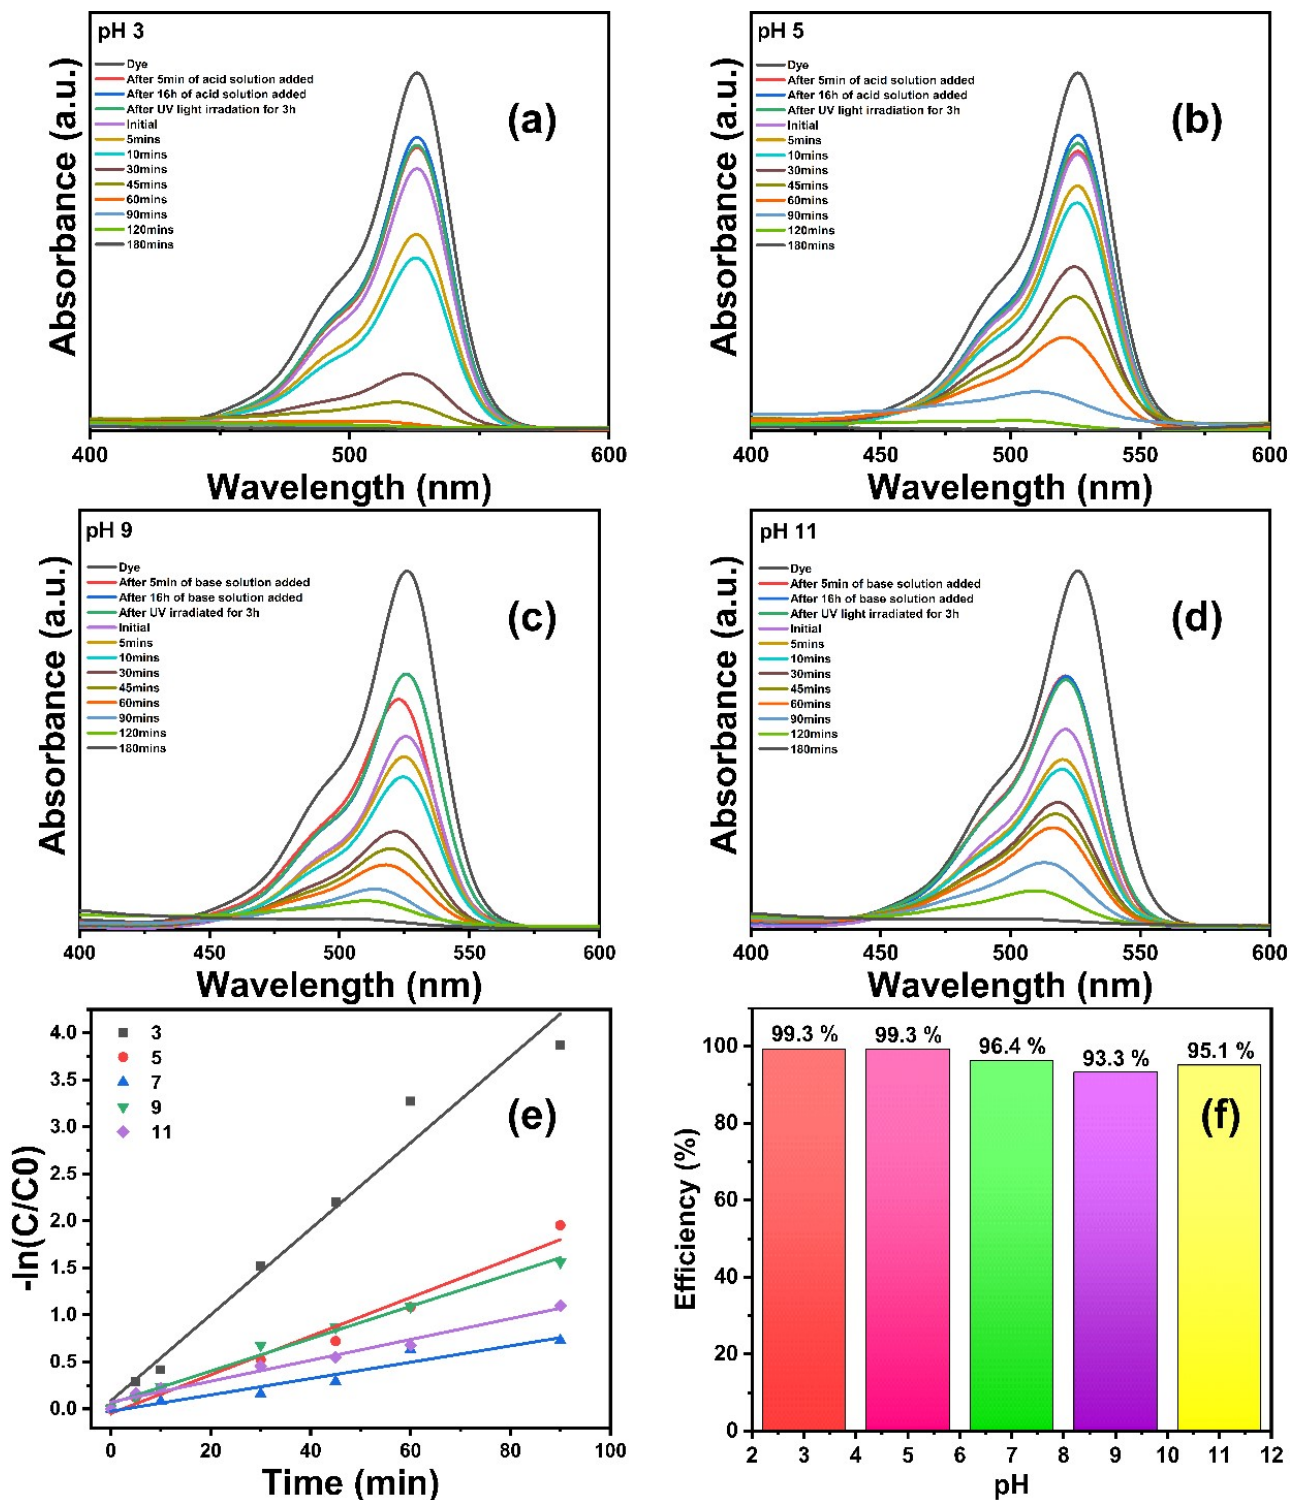

Figure S8: Effect of pH on degradation of Rh-6g using g-C<sub>3</sub>N<sub>4</sub> photocatalysts under UV light. (a) pH 3, (b) pH 5, (c) pH 9, (d) pH 11, (e) Rate constant, (f) Efficiency bar graph for 180 min.

#### 4.5 RECYCLE AND STABILITY TEST ON g-C<sub>3</sub>N<sub>4</sub> IN Rh-6G DYE

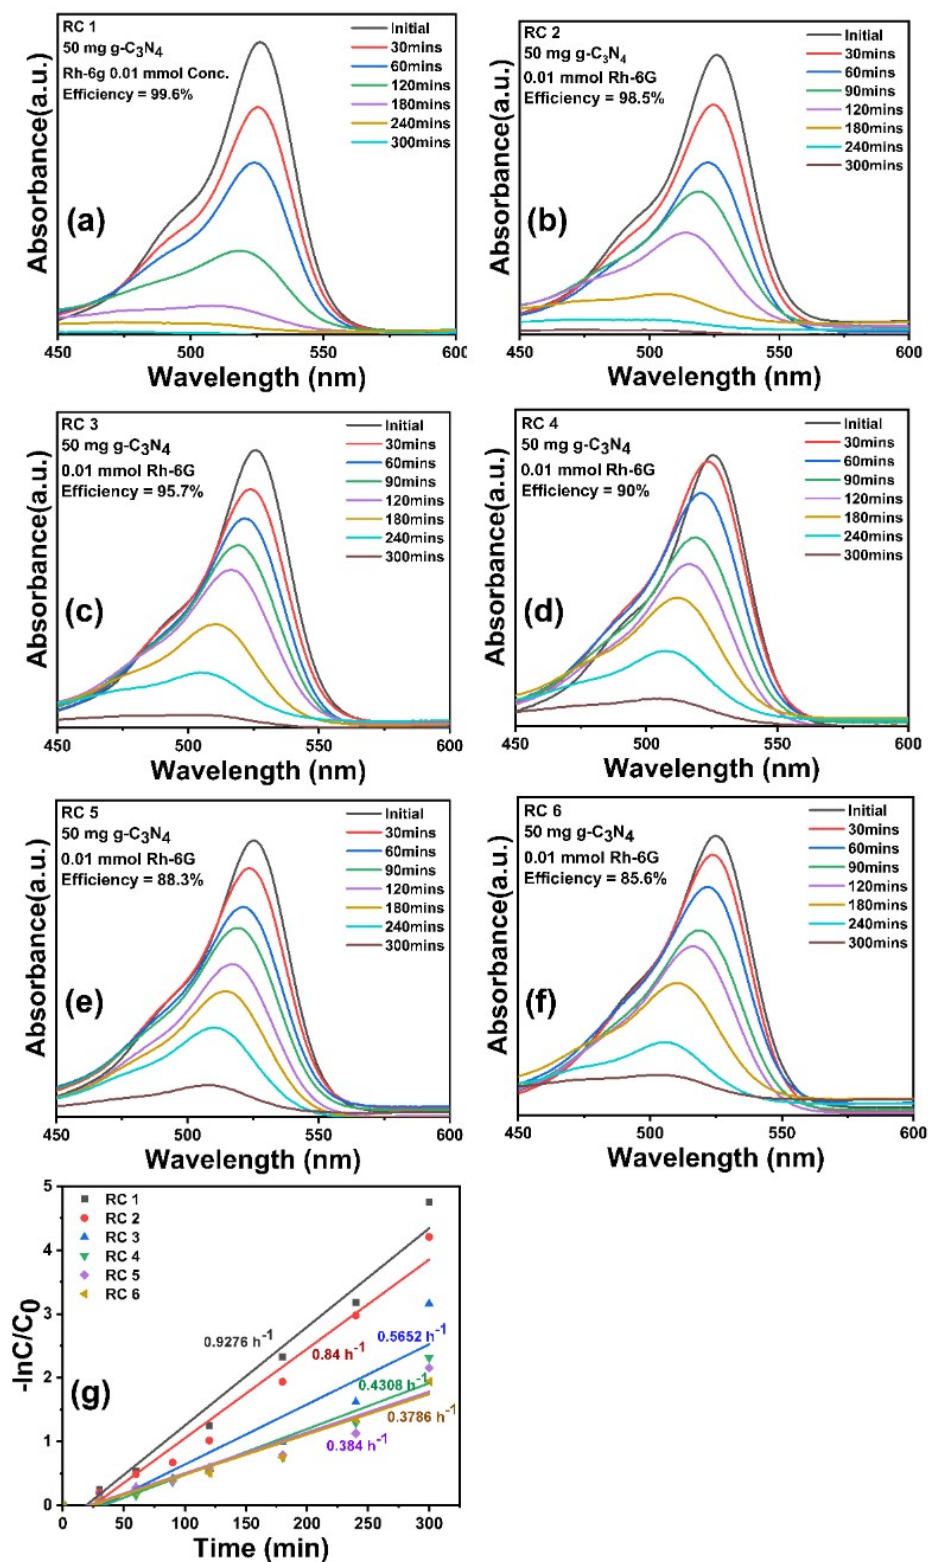

Figure S9: Recyclability of g-C<sub>3</sub>N<sub>4</sub> photocatalyst under UV light illumination in six runs of cycles. (a) RC1, (b) RC2, (c) RC3, (d) RC4, (e) RC5, (f) RC6, (g) Rate constant.
